# Supplementary material for: Aleuritolic Acid Impaired Autophagic Flux and Induced Apoptosis in Hepatocellular Carcinoma HepG2 Cells
Source: MDPI journal article supplement (doi:10.3390/molecules23061338), 2018-06-02
Supplement: s1 [file s1]

## Extraction and Isolation

The dried and powdered roots of *Croton crassifolius* (29.4 kg) were percolated with MeOH (364 L) at room temperature. The extracts were combined and concentrated under reduced pressure to leave a residue, which was then mixed with diatomite and eluted with petroleum ether (60 L), CHCl<sub>3</sub> (80 L), and EtOAc (40 L). The petroleum ether extract (1321.4 g) was chromatographed on silica gel column with gradient mixtures of petroleum ether-EtOAc (100:1 → 1:1) to afford ten fractions, Fr. A to Fr. J. Fr. G (2.1 g) was subjected to silica gel column (petroleum ether-acetone, 15:1 → 2:1), then separated over ODS column chromatography with 60% MeOH-H<sub>2</sub>O to yield compound A (6 mg).

## Structure elucidation

Compound A (C<sub>30</sub>H<sub>48</sub>O<sub>3</sub>), white amorphous powder; <sup>1</sup>H NMR (CDCl<sub>3</sub>, 400 MHz) δ<sub>H</sub>: 5.53 (1H, dd, J = 7.8, 3.3 Hz), 0.96 (3H, s), 0.95 (3H, s), 0.93 (3H, s), 0.92 (3H, s), 0.92 (3H, s), 0.91 (3H, s), 0.80 (3H, s) (Supplementary Figure 1A); <sup>13</sup>C NMR (CDCl<sub>3</sub>, 100 MHz) δ<sub>C</sub>: 37.9 (C-1), 27.3 (C-2), 79.1 (C-3), 39.2 (C-4), 55.6 (C-5), 19.0 (C-6), 41.1 (C-7), 38.9 (C-8), 49.3 (C-9), 38.2 (C-10), 17.5 (C-11), 33.8 (C-12), 37.5 (C-13), 160.8 (C-14), 116.9 (C-15), 31.6 (C-16), 51.5 (C-17), 41.6 (C-18), 35.5 (C-19), 29.4 (C-20), 33.5 (C-21), 30.9 (C-22), 28.1 (C-23), 15.7 (C-24), 15.6 (C-25), 26.3 (C-26), 22.6 (C-27), 183.4 (C-28), 32.1 (C-29), 28.8 (C-30) (Supplementary Figure 1B). The spectral data were similar to aleuritolic acid reported previously [1]. Compound A was established as aleuritolic acid.

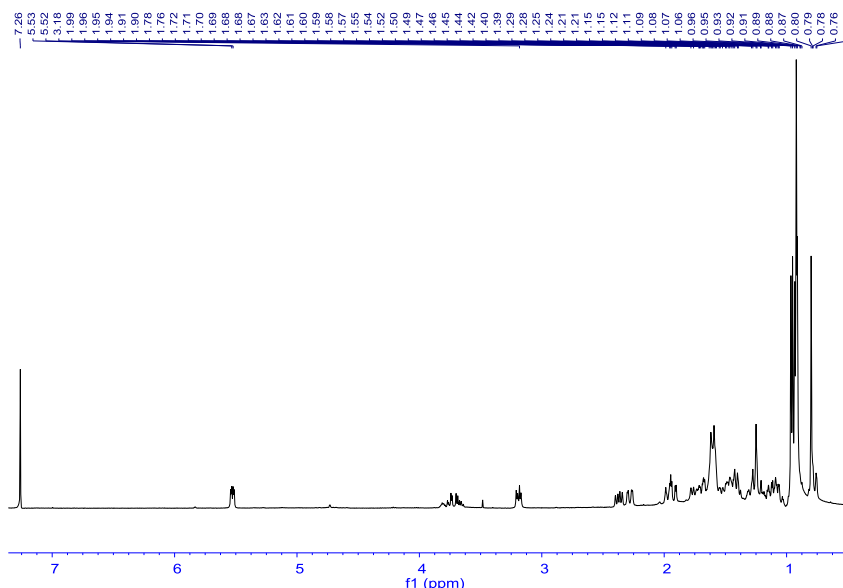

Supplementary Figure 1 <sup>1</sup>H NMR spectrum of Compound A (400 MHz, CDCl<sub>3</sub>)

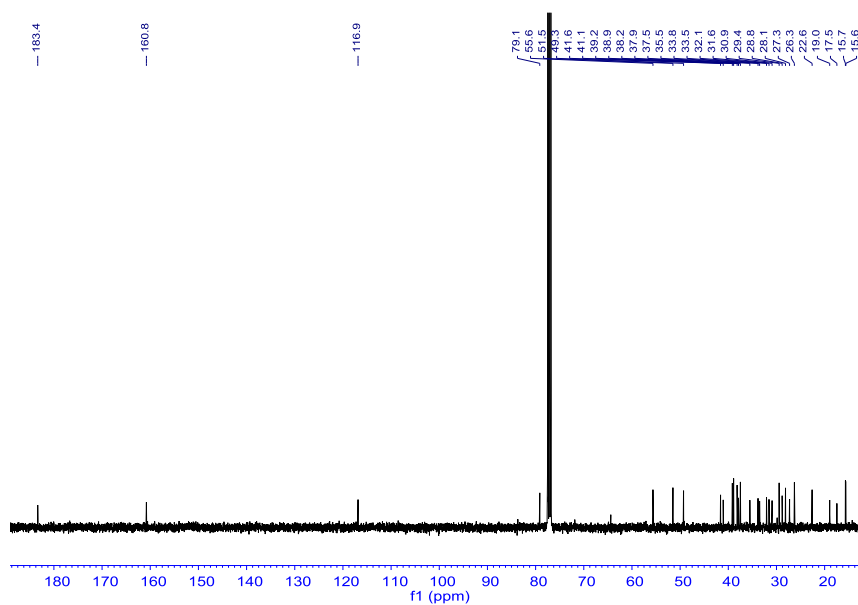

Supplementary Figure 2 <sup>13</sup>C NMR spectrum of Compound A (100 MHz, CDCl<sub>3</sub>)

### Supplementary reference

[1] Chaudhuri S K, Fullas F, Brown D M, et al. Isolation and structural elucidation of pentacyclic triterpenoids from *Maprounea africana*[J]. Journal of Natural Products, 1995, 58(1): 1-9.
